# Supplementary material for: Phosphorylated cingulin localises GEF-H1 at tight junctions to protect vascular barriers in blood endothelial cells
Source: PubMed Central journal article supplement (PMC8445606; doi:10.1242/jcs.258557), 2021-09-02
Supplement: joces-134-258557-s1.pdf [file joces-134-258557-s1.pdf]

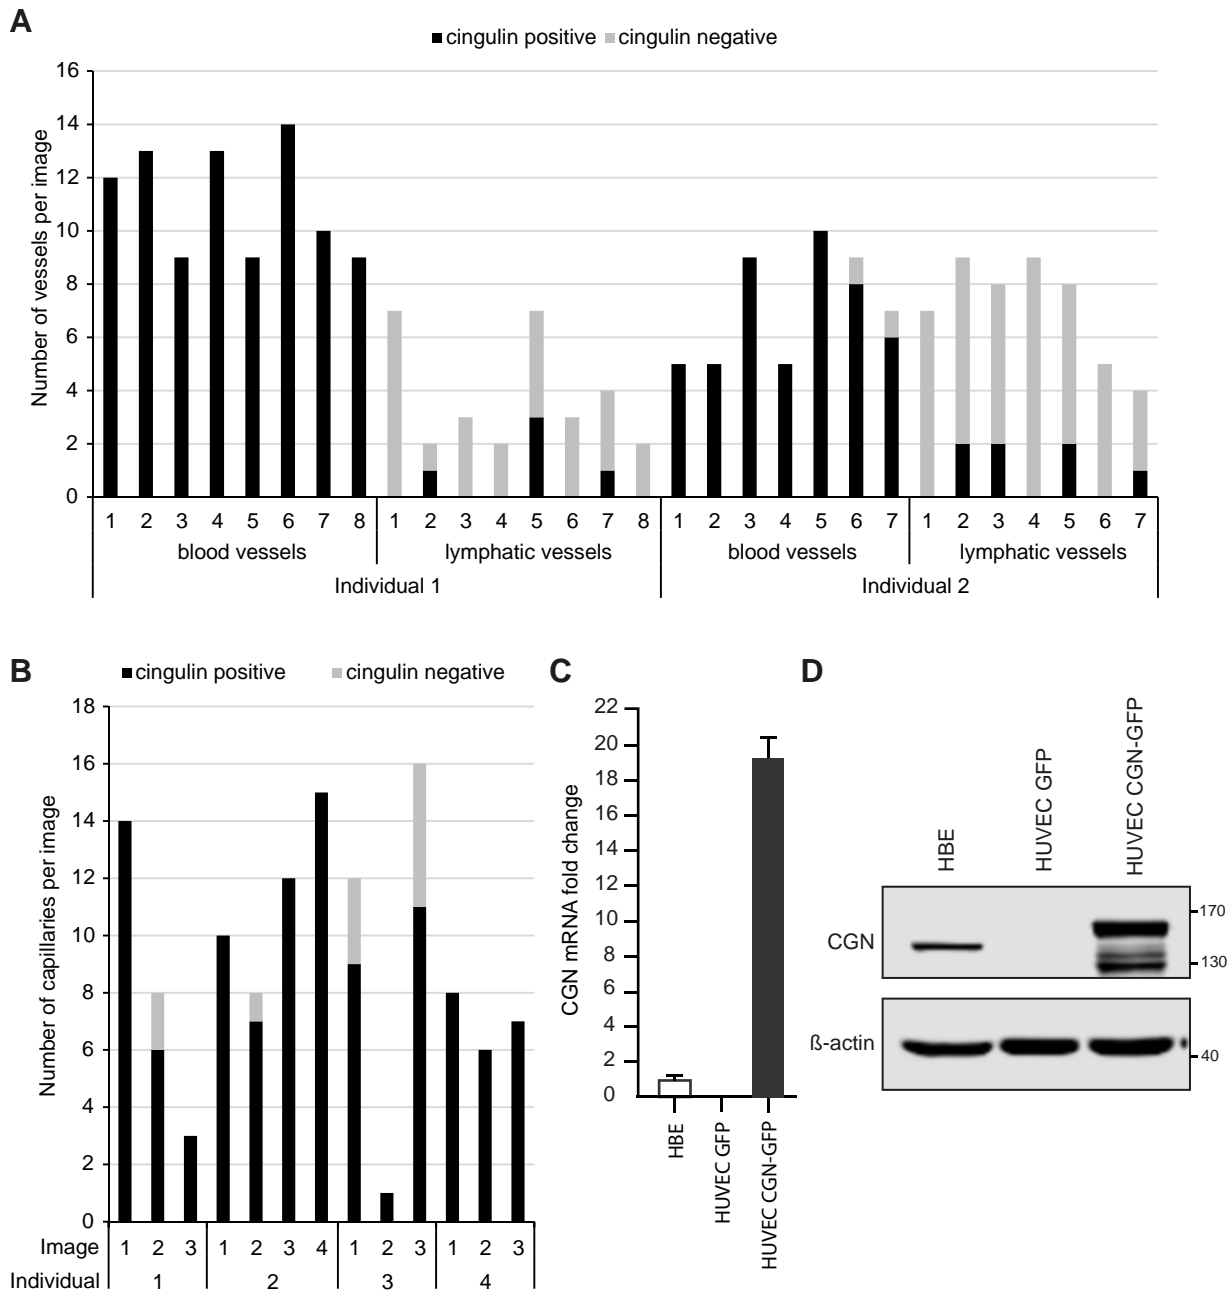

**Fig. S1. Expression of cingulin.** (A) Quantification of cingulin positive and cingulin negative vessels in papillary dermis samples from healthy individuals. (B) Quantification of cingulin positive and cingulin negative capillaries in the papillary dermis of healthy individuals. (C) mRNA levels of cingulin are shown in the indicated cells and shown as fold-change relative to that of human bronchial epithelial cells (HBEs). (D) Western blots of cingulin in the indicated cells. HBEs were used as the positive control.

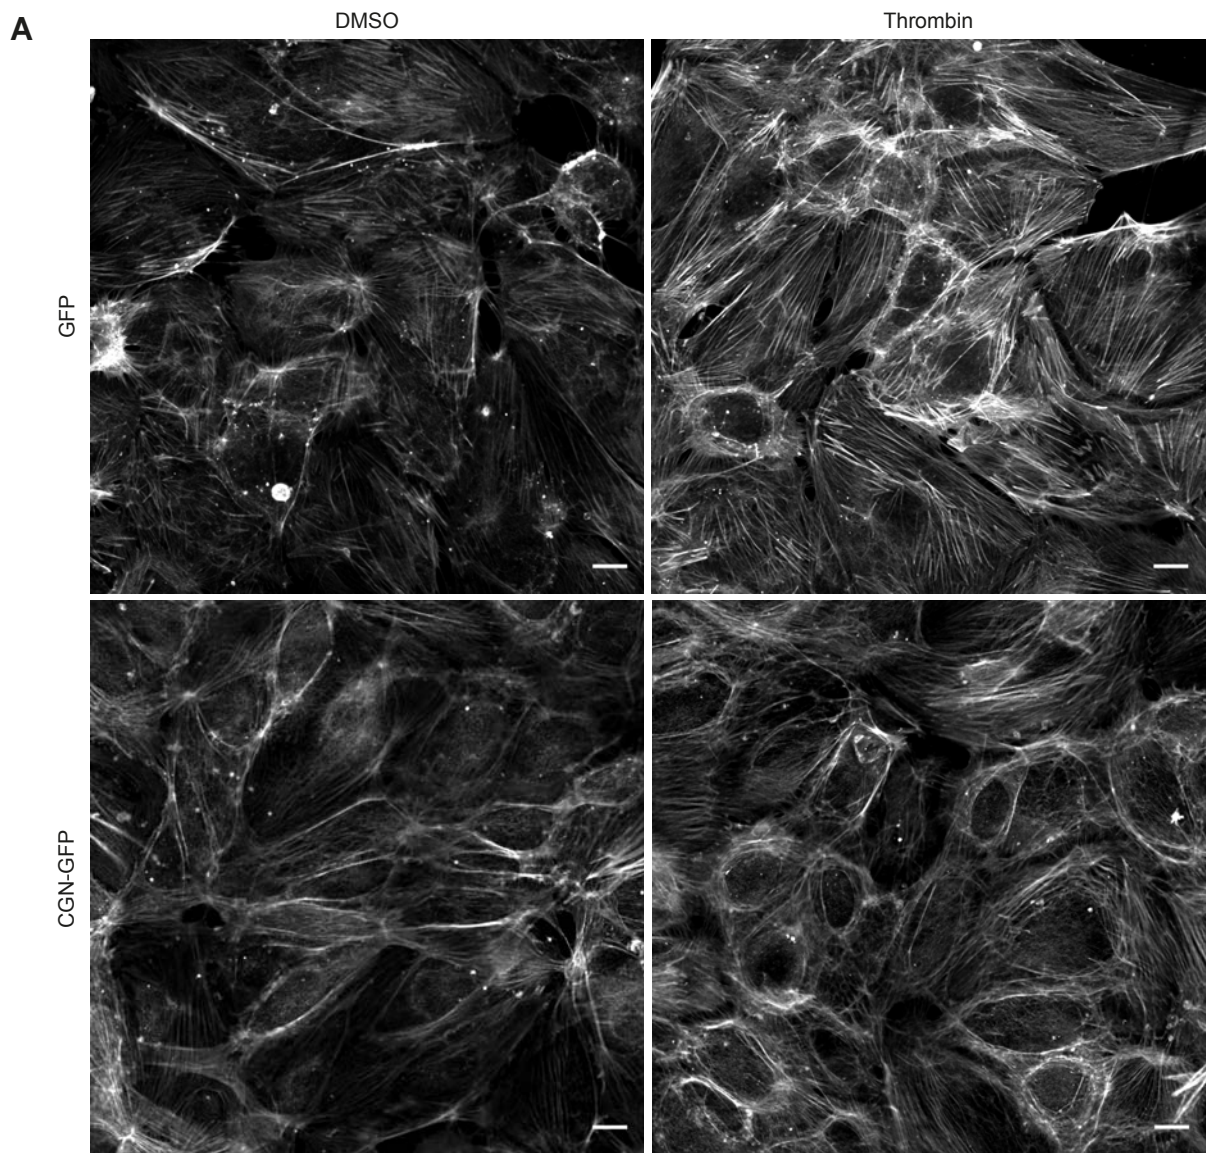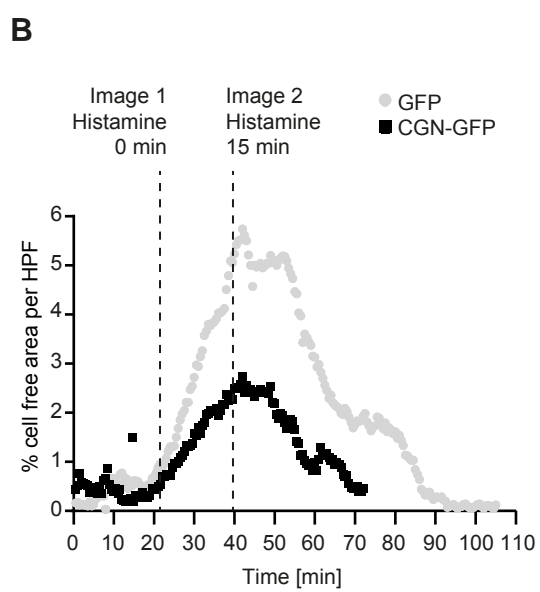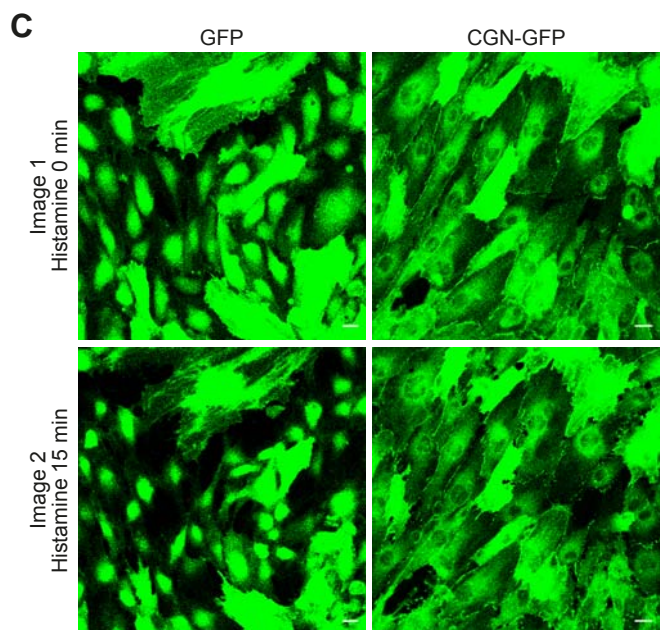

**Fig. S2. Cingulin overexpression prevents thrombin-induced actin stress fibre formation in HUVECs.** (A) Immunofluorescence images of cingulin-overexpressing (CGN-GFP) or control cells (GFP) stained for actin (grey) after 15 min of thrombin (0.5 U/ml) stimulation. Cortical actin increased, and thrombin-induced actin stress fibre formation was prevented in CGN-GFP cells. Scale bar equals 20  $\mu\text{m}$ . (B) CGN-GFP or GFP HUVECs were stimulated with histamine (10  $\mu\text{g/ml}$ ), and cell-free area per high power field (HPF) was imaged and quantified over time. (C) Corresponding live-cell images with cell-free areas in CGN-GFP or GFP HUVECs are shown. Scale bar equals 20  $\mu\text{m}$ .

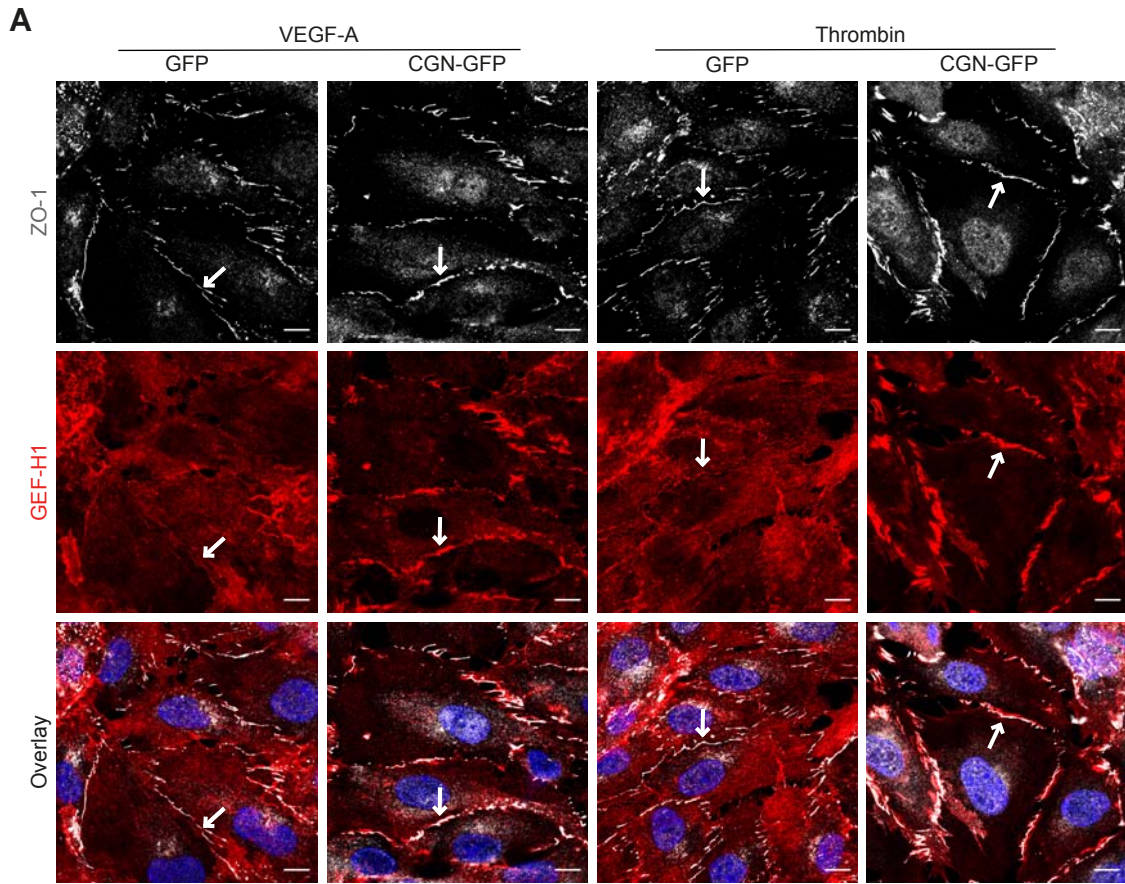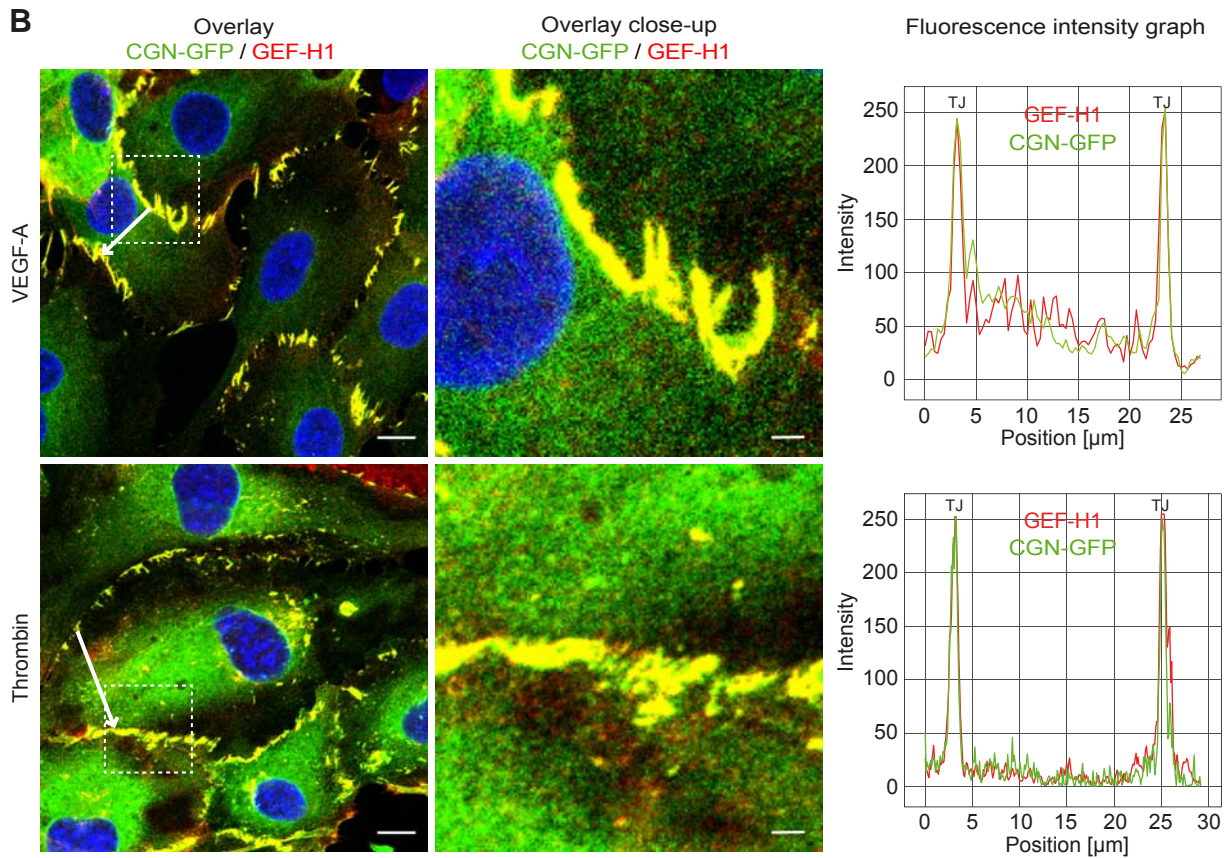

**Fig. S3. The colocalisation of GEF-H1 and ZO-1 after VEGF-A or thrombin stimulation is cingulin-dependent.** (A) Cingulin-overexpressing (CGN-GFP) or control cells (GFP) were stained for ZO-1 (grey) and GEF-H1 (red) after 15 min stimulation with VEGF-A (50 ng/ml) or thrombin (0.5 U/ml). Nuclei were stained with DAPI (blue). Scale bar equals 10  $\mu$ m. (B) Left: Cingulin-overexpressing cells (green) were stained for GEF-H1 (red) after 15 min of VEGF-A (50 ng/ml) or thrombin (0.5 U/ml) stimulation. Nuclei were stained with DAPI (blue). Scale bar equals 10  $\mu$ m. Immunofluorescence intensity was quantified along the white arrow. Middle: Close-up of the images on the left. Scale bar equals 2  $\mu$ m. Right: Immunofluorescence intensity graphs for cingulin (green) and GEF-H1 (red).

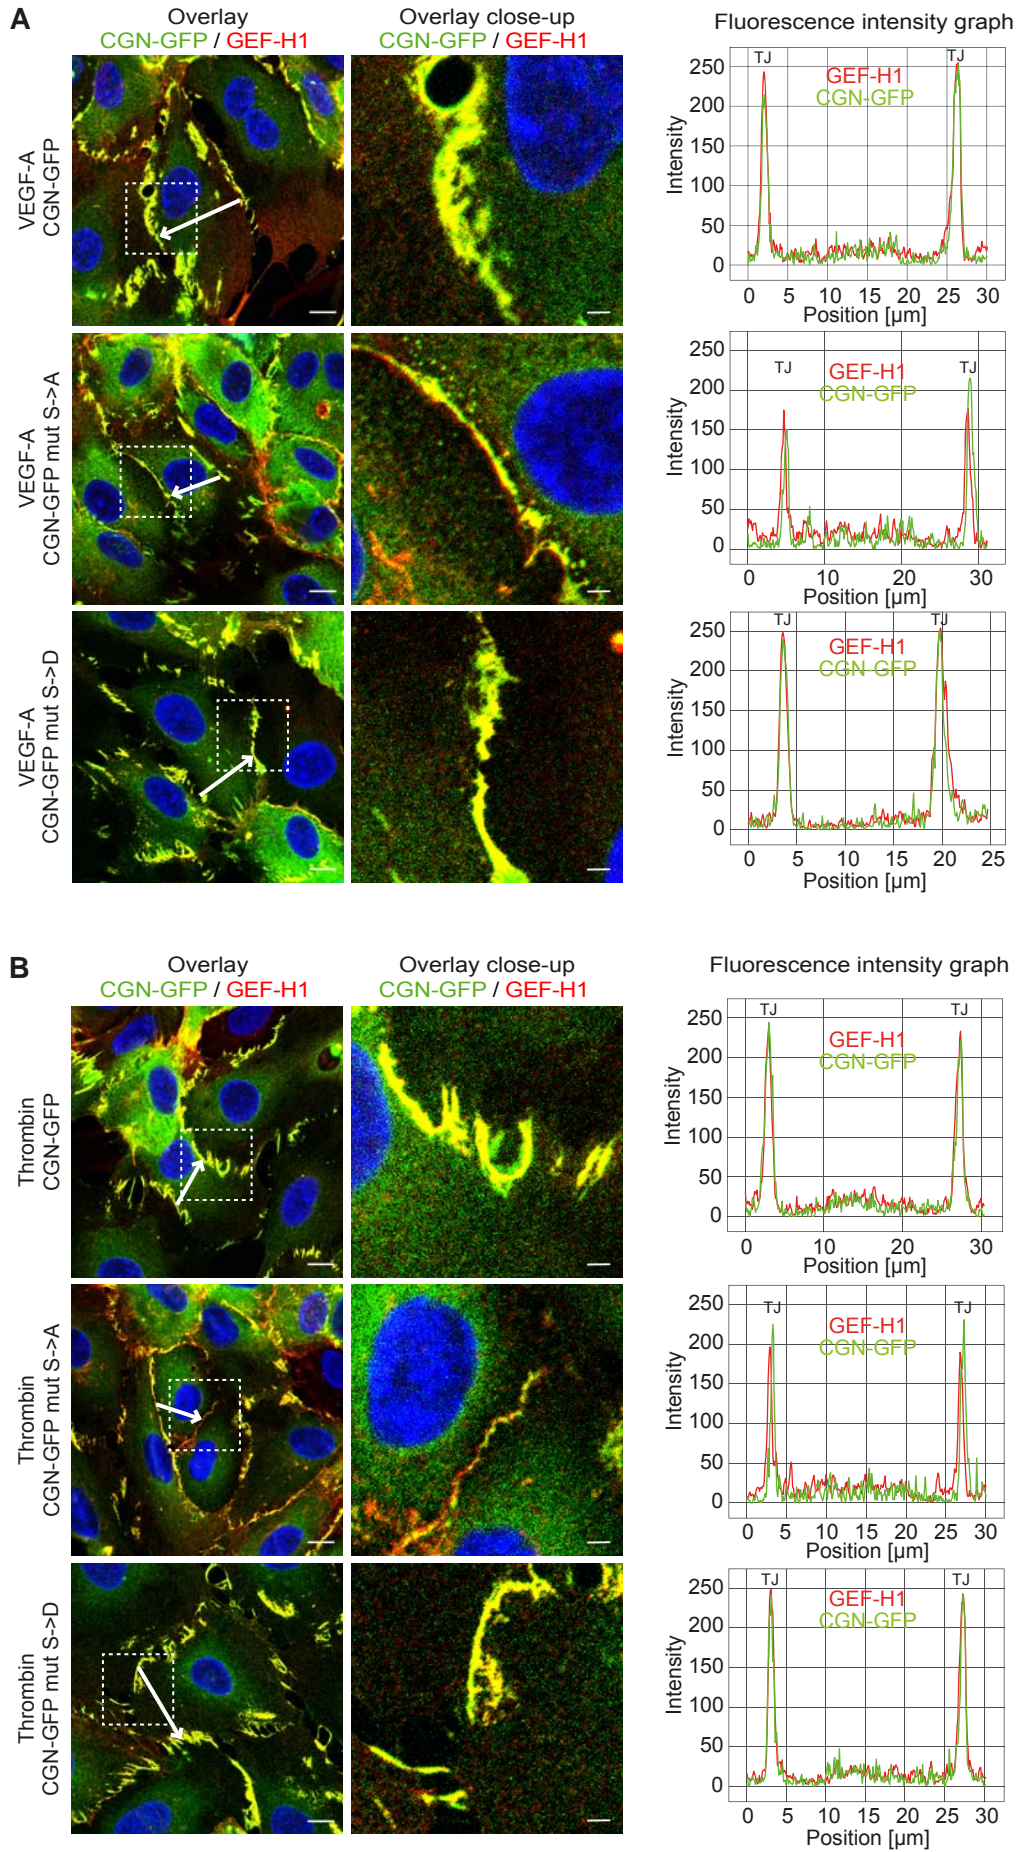

**Fig. S4. The colocalisation of GEF-H1 and cingulin after VEGF-A or thrombin stimulation is dependent on S131, S134, and S149.** (A, B) Left: CGN-overexpressing cells (CGN-GFP), phosphodead mutant cells (CGN mut S->A), and phosphomimetic mutant cells (CGN mut S->D) were stained for cingulin (green) and GEF-H1 (red) after 15 min of (A) VEGF-A (50 ng/ml) or (B) thrombin (0.5 U/ml) stimulation. Nuclei were stained with DAPI (blue). Scale bar equals 10  $\mu$ m. Immunofluorescence intensity was quantified along the white arrow. Middle: Close-up of the images on the left. Scale bar equals 2  $\mu$ m. Right: Immunofluorescence intensity graphs for cingulin (green) and GEF-H1 (red).
